# Supplementary material for: Traumatic spinal cord injury: identifying independent risk factors and predictive model development for symptomatic urinary tract infections
Source: PeerJ. 2025 May 28;13:e19473. doi: 10.7717/peerj.19473 (PMC12126090; doi:10.7717/peerj.19473)
Supplement: Supplemental Information 3 [file peerj-13-19473-s003.xlsx]

## Sheet: Sheet1
ID	Creatinine	Proteinuria	Times of indwelling catheter use	Albumin	Department	Times of antibiotic use	Gender	Age	Length of hospital stay	Symptomatic urinary tract infection	Polytrauma	Injury level	AIS grade
116418	46.9	0	105	35.8	1	117	1	58	208	2	0	1	1
119735	40.5	0	126	35.1	1	52	1	35	136	2	0	1	1
124591	35.9	0	132	32.6	1	155	1	41	133	2	1	1	1
121185	64.9	3	177	43.4	1	102	1	35	455	2	0	1	1
112711	50.8	1	98	33.1	2	64	1	51	106	2	0	1	1
123766	79.3	0	109	29.1	2	251	1	58	366	2	0	1	1
131300	44.8	0	38	33.4	1	121	1	42	231	2	0	1	1
123945	44.9	3	116	27.4	2	201	1	26	458	2	0	1	1
131346	41.9	0	103	36.2	1	278	1	26	374	2	1	1	1
112373	30.2	0	123	32	3	65	2	39	163	2	0	1	1
109453	74.8	0	81	40.6	1	82	1	26	157	2	0	1	1
123686	68.3	2	89	38.8	1	845	1	31	371	2	0	1	1
114114	67.3	0	125	36.9	3	28	1	54	136	2	0	2	1
122283	50.5	0	17	35.5	2	53	1	32	440	2	1	2	1
117081	65.9	0	69	40.7	1	20	1	27	396	2	1	2	1
119797	45.4	0	54	42.6	1	60	2	40	70	2	1	2	1
119440	54.5	1	10	30.2	1	159	1	51	44	2	1	2	1
113983	51.4	0	67	37.1	1	61	1	49	90	2	0	2	1
116339	69.2	0	108	43.3	1	294	1	55	185	2	1	2	1
120089	60.9	0	38	39.9	1	30	1	53	43	2	1	2	1
124876	39.5	0	74	31.6	2	136	1	45	350	2	1	2	1
120046	42.5	0	87	34.9	1	93	1	45	159	2	1	2	1
117259	66.3	0	45	38.8	1	125	1	42	162	2	1	2	1
113877	60.3	0	15	34.5	2	24	1	51	118	2	1	2	1
131482	43.2	0	7	38.2	2	36	2	39	357	2	0	2	1
123993	68.7	0	45	35.8	2	104	1	31	242	2	1	2	1
119231	49.2	0	17	35.6	2	14	2	32	179	2	1	2	1
124099	60.4	0	9	34.9	1	37	1	55	440	2	0	2	1
118431	54.3	0	42	36.5	1	165	1	44	375	2	0	2	1
113655	59.7	0	27	39.1	1	45	1	19	104	2	1	2	1
120090	70.8	0	28	39.5	1	69	1	29	420	2	0	2	1
133316	64.7	0	127	35	1	37	1	43	186	2	1	2	1
113936	50.3	1	69	35.4	2	26	1	58	90	2	0	2	1
115411	74.3	0	70	37.6	1	116	1	27	357	2	1	2	1
129005	63.1	0	23	38.3	1	48	1	35	29	2	1	2	1
130790	73.4	0	31	37.6	1	37	1	28	76	2	0	2	1
121079	68.7	0	92	38.7	1	228	1	35	367	2	1	2	1
129719	61.1	0	27	38.6	2	15	2	41	112	2	0	2	1
115743	37.5		25	35.3	1	64	2	30	164	2	1	2	1
123168	68.5	0	10	38	1	14	1	36	61	2	0	2	1
121960	69.3	0	144	33.7	1	328	1	36	353	2	1	2	1
131624	66.2	0	74	41.5	1	112	1	32	88	2	0	2	1
131521	38.8	1	56	36.5	1	46	2	43	305	2	0	2	1
113248	58.6	0	173	37.1	1	191	1	29	363	2	1	2	1
114672	48	0	97	31.7	3	128	1	44	97	2	1	2	1
113625	62.3	0	99	37.9	1	152	1	21	216	2	0	2	1
115823	63.4	0	58	39.6	1	114	1	42	63	2	0	2	1
130276	52.6	1	28	40.6	2	34	1	60	300	2	1	2	1
115832	60.3	0	13	38.3	2	12	1	59	74	2	0	2	1
112654	54.7	0	121	33.2	1	66	1	47	403	2	1	1	2
119095	83.7	0	59	35	2	27	1	59	128	2	0	1	2
120813	70.4	0	34	41	1	20	1	50	92	2	0	1	2
132547	37.9	1	36	35.6	1	34	2	59	116	2	0	1	2
115311	66.5	0	79	31.3	1	59	1	59	115	2	0	1	2
117715	55.8	0	78	37.9	1	71	1	46	183	2	0	1	2
129754	33.7	0	49	38.4	1	73	1	54	74	2	0	1	2
132570	68.9	0	92	35.1	1	195	1	63	262	2	0	1	2
111779	52.1	0	92	37.1	2	52	1	36	164	2	0	1	2
130139	68.1	0	11	42.7	2	8	1	25	52	2	0	1	2
129233	41.4	0	103	35.6	1	148	1	34	223	2	1	1	2
121301	56.6	0	32	35.2	1	97	1	33	142	2	1	1	2
122824	63.2	0	36	38.7	2	94	2	19	158	2	0	1	2
122599	55.7	0	57	36.6	1	179	1	54	134	2	0	1	2
124182	56.6	0	17	41.4	1	41	1	27	174	2	0	3	2
115363	52.6	3	78	42.4	1	50	1	45	105	2	1	2	2
112333	75.7	1	38	39.1	1	41	1	48	155	2	1	2	2
115843	56.6	0	72	36	3	30	1	55	88	2	1	2	2
113769	43.5	0	0	32.7	2	14	2	59	180	2	0	2	2
120201	57.6	0	326	39.9	1	167	1	35	336	2	1	2	2
122212	38.9	0	9	34.5	2	74	1	35	355	2	0	2	2
133376	37.4	0	21	38.3	1	33	2	31	182	2	1	2	2
133143	59.7	0	56	36.9	1	47	1	52	64	2	1	2	2
124103	78.8	0	28	37.8	2	5	1	37	302	2	1	2	2
122383	58.8	0	27	35.1	1	25	1	44	303	2	0	1	3
113221	79.1	0	14	34.3	1	58	1	58	155	2	0	1	3
132581	58.9	0	80	31.6	1	170	1	59	106	2	1	1	3
119853	55.4	0	2	29.8	2	17	1	63	142	2	0	1	3
115117	54	0	167	34.9	1	369	1	41	364	2	0	1	3
132131	52.4	0	59	35.7	2	33	1	54	352	2	0	1	3
130075	52.1	0	17	37.8	1	22	1	55	52	2	1	1	3
116197	60.4	0	26	36.6	3	84	1	49	202	2	0	1	3
115310	69.5	1	44	37.3	2	30	1	57	43	2	0	1	3
115982	81.3	1	32	40.8	3	0	1	48	44	2	0	1	3
113383	77.6	0	3	36.3	3	10	1	23	224	2	0	1	3
121181	68.7	0	32	36.8	2	31	1	37	161	2	0	1	3
131846	52	0	20	33.9	1	66	1	54	149	2	1	3	3
122377	53.9	0	22	42.4	1	110	1	46	350	2	0	2	3
121444	80.6	0	38	42.1	1	97	1	26	51	2	1	2	3
122221	62.4	1	41	35.3	1	74	1	57	104	2	0	1	4
112678	59.7	0	0	33.7	1	2	1	55	44	2	0	1	4
119864	89.1	0	39	39.4	1	62	1	39	90	2	1	1	4
119183	86	0	30	32.5	2	33	1	63	185	2	0	1	4
124560	44.6	0	42	40.2	1	118	1	27	395	2	1	2	4
112193	69.2	0	65	31.4	1	10	1	57	122	2	1	1	1
120252	41.4	0	45	37.7	1	35	2	33	388	2	1	1	2
130016	69.1	1	8	40.5	1	28	1	60	232	2	0	1	4
119450	34.6	0	25	40.1	1	62	1	59	28	1	1	1	1
124476	69.1	0	19	41.3	1	18	1	37	19	1	0	1	1
113975	54.8	1	126	40.5	3	140	1	51	175	1	0	1	1
130280	38.6	1	91	30.8	2	40	1	33	92	1	1	1	1
119137	70.6	0	111	36.2	2	0	1	57	209	1	0	1	1
133411	31.9	2	39	33.8	2	8	2	61	120	1	1	1	1
113751	56	0	13	33.8	3	4	1	52	238	1	0	1	1
120340	57	0	15	39.3	1	0	1	25	120	1	1	3	1
113311	75.1	0	59	43.8	3	52	1	41	464	1	0	3	1
131227	69.9	0	18	43.3	1	32	1	18	365	1	0	3	1
125063	66.2	0	6	40.5	2	0	1	23	48	1	0	3	1
133212	32.3	0	121	37.1	1	41	1	23	166	1	1	2	1
132079	52.5	0	44	40.2	1	4	1	37	171	1	1	2	1
120092	44.8	0	47	40.9	1	50	2	50	47	1	1	2	1
116118	52.6	0	80	36.3	3	332	1	24	447	1	0	2	1
131457	47.4	0	10	37.3	1	9	2	39	61	1	1	2	1
124518	51.6	0	30	36.8	1	21	1	28	140	1	1	2	1
115592	45.7	0	50	39.2	1	19	2	45	91	1	0	2	1
131095	60.6	0	20	41.1	2	0	1	38	54	1	0	2	1
113890	52.1	0	3	39.1	3	14	1	21	59	1	0	2	1
123894	66.6	0	32	37.7	1	28	1	53	140	1	0	2	1
117401	45.4	2	36	36.8	1	47	2	36	108	1	0	2	1
119679		1	54	37.1	1	28	1	23	82	1	0	2	1
113269	45.1	0	28	36.8	3	8	2	58	109	1	0	2	1
119790	66.7	1	40	38.2	1	34	1	31	139	1	0	2	1
133315	41.9	0	103	39.5	1	163	1	32	233	1	0	2	1
116647	61.5	0	23	40.1	2	14	1	37	45	1	0	2	1
122490	52.2	0	72	28.5	1	57	1	56	123	1	0	1	2
118816	43.8	0	5	36.6	2	12	1	32	208	1	0	1	2
119518	68.9	0	3	34.4	2	2	1	36	37	1	0	1	2
114154	29.8	0	34	37.9	3	0	2	33	33	1	1	3	2
115135	53.7	0	46	38.2	1	49	1	33	112	1	1	3	2
114431	39.3	0	51	34.3	3	137	1	54	237	1	0	3	2
113672	51	1	15	34	3	3	1	51	64	1	0	3	2
121502	28.3	0	30	40	1	12	1	49	30	1	0	2	2
121678	68	0	13	37.1	2	12	1	59	32	1	1	2	2
120879	77.4	0	25	35.7	1	27	1	61	52	1	0	2	2
129779	40.3	0	12	41.5	1	5	2	26	139	1	0	2	2
114410	69.9	0	0	43.8	3	0	1	28	43	1	1	2	2
112933	60.2	0	61	35.9	3	108	1	19	109	1	1	2	2
123700	36.5	1	28	33.7	1	42	2	42	159	1	0	2	2
123525	52.8	1	51	32.2	1	23	1	60	214	1	0	1	3
114942	74.2	1	14	37.7	2	14	2	55	153	1	1	1	3
115093	62.1	0	16	37.2	2	0	1	37	115	1	0	1	3
133070	37.6	0	67	35.9	1	52	1	48	87	1	0	1	3
112805	52.7	0	105	32.7	3	62	1	61	112	1	0	1	3
120993	51.3	0	13	34.6	2	11	1	52	35	1	0	1	3
120294	60.4	0	22	36.5	1	33	1	50	84	1	0	1	3
122570	32.7	0	9	34.8	1	36	2	58	108	1	0	1	3
129288	63.3	2	18	35.7	1	47	1	53	32	1	0	1	3
114995	60.3	0	53	37.3	3	19	1	41	100	1	1	1	3
117818	58.8	1	36	38.1	1	3	1	54	53	1	0	3	3
113932	64.6	0	0	40.8	3	0	1	20	32	1	0	3	3
116879	79	1	15	37	3	0	1	27	88	1	0	2	3
116213	59.2	0	0	42	1	9	1	35	70	1	1	2	3
117047	48	0	0	36.4	1	14	2	40	43	1	0	2	3
117870	69.6	0	10	33.9	2	15	1	57	170	1	0	1	4
120974	55.2	0	31	34.9	1	0	1	51	79	1	0	1	4
120542	67.9	0	0	41.6	1	26	1	40	71	1	0	1	4
113458	74.9	0	0	40.2	2	0	1	39	60	1	0	1	4
117119	54.3	0	36	37.9	1	24	1	59	168	1	0	1	4
127258	41.4	3	23	35.2	1	29	1	46	80	1	1	1	4
123411	59.5	0	27	37.4	2	0	1	41	88	1	0	1	4
118370	63.6	0	18	34.3	2	11	1	48	90	1	0	1	4
121440	74.3	0	3	37.3	1	0	1	42	43	1	0	1	4
131366	57.4	0	10	40.2	1	0	1	57	204	1	0	1	4
131595	73.9	0	0	41.1	1	18	1	61	154	1	0	1	4
117262	52.8	0	0	35.8	2	5	2	44	92	1	0	1	4
119929	40.7	0	1	41.4	1	3	2	26	79	1	0	3	4
119270	88	0	50	39	1	15	1	39	183	1	0	2	4
119309	51.9	0	26	39.2	1	53	1	22	26	1	0	2	1
133457	61.8	0	8	38.1	1	53	1	55	38	1	0	1	4
